# Supplementary material for: Designing a Rh-based bimetallic catalyst for heterogeneous ethylene hydroformylation: combining theoretical predictions and experimental screening
Source: Royal Society of Chemistry journal article supplement (doi:10.1039/d4cy00959b), 2024-12-23
Supplement: d4cy00959b1.pdf [file d4cy00959b1.pdf]

## Supplementary Information

### Designing a Rh-based bimetallic catalyst for heterogeneous ethylene hydroformylation: Combing theoretical predictions and experimental screening

Ning Huang<sup>a,c,1</sup>, Yue Ma<sup>b,d,1</sup>, Boyang Liu<sup>e,a</sup>, Letong Yang,<sup>a</sup> Xiaocheng Lan<sup>a,f</sup>, Xiaodong Wu<sup>b,\*</sup>, Tiefeng Wang<sup>a,f,\*</sup>

<sup>a</sup> Beijing Key Laboratory of Green Reaction Engineering and Technology, Department of Chemical Engineering, Tsinghua University, Beijing 100084, China;

<sup>b</sup> The Key Laboratory of Advanced Materials of Ministry of Education, School of Materials Science and Engineering, Tsinghua University, Beijing 100084, China;

<sup>c</sup> Sinopec Economics & Development Research Institute Company Limited, Beijing 100029, China;

<sup>d</sup> Department of Chemistry and Catalysis Research Center, Technische Universität München, Garching 85748, Germany.

<sup>e</sup> School of Chemistry and Chemical Engineering, Nanjing University of Science and Technology, Nanjing, Jiangsu 210094, China;

<sup>f</sup> Ordos Laboratory, Ordos, Inner Mongolia 017010, China.

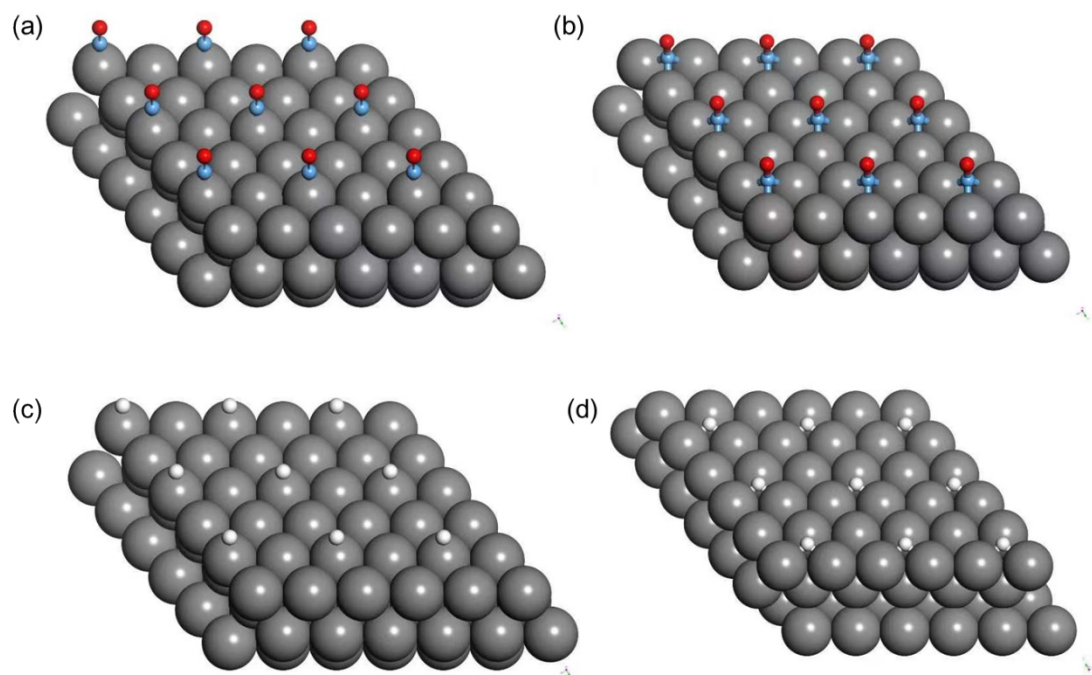

**Fig. S1.** Configurations of CO on (a) top and (b) hollow sites and H on (c) top and (d) hollow sites of Rh (111) surface. Atom color codes: Rh (grey), C (blue), O (red) and H (white).

<sup>1</sup> These authors contributed equally to this work.

\* Corresponding author: Xiaodong Wu (wuxiaodong@tsinghua.edu.cn), Tiefeng Wang (wangtf@tsinghua.edu.cn).

**Table S1.** CO adsorption energy ( $E_{\text{ads-CO}}$ ) on different surfaces by DFT calculations

| Surface | $E_{\text{ads-CO}}$ on top site<br>(eV) | $E_{\text{ads-CO}}$ on hollow site<br>(eV) |
|---------|-----------------------------------------|--------------------------------------------|
| Rh      | -2.02                                   | -2.20                                      |
| RhFe    | -2.17                                   | -2.04                                      |
| RhCo    | -2.14                                   | -2.18                                      |
| RhNi    | -2.11                                   | -2.17                                      |
| RhCu    | -2.14                                   | -1.88                                      |
| RhZn    | -2.24                                   | -1.34                                      |

**Table S2.** H adsorption energy ( $E_{\text{ads-H}}$ ) on different surfaces by DFT calculations

| Surface | $E_{\text{ads-H}}$ on top site<br>(eV) | $E_{\text{ads-H}}$ on hollow site<br>(eV) |
|---------|----------------------------------------|-------------------------------------------|
| Rh      | -0.22                                  | -0.59                                     |
| RhFe    | -0.30                                  | -0.53                                     |
| RhCo    | -0.25                                  | -0.56                                     |
| RhNi    | -0.25                                  | -0.58                                     |
| RhCu    | -0.27                                  | -0.52                                     |
| RhZn    | -0.38                                  | -0.58                                     |

**Table S3.** Performance of the catalysts in ethylene hydroformylation.

| Catalyst              | Ethylene<br>conversion<br>(%) | Yield (%) |                       |                        |        | Oxy<br>selectivity <sup>b</sup><br>(%) |
|-----------------------|-------------------------------|-----------|-----------------------|------------------------|--------|----------------------------------------|
|                       |                               | Propanal  | Propanol <sup>a</sup> | Total oxo <sup>b</sup> | Ethane |                                        |
| Rh/SiO <sub>2</sub>   | 4.95                          | 1.92      | 0.60                  | 2.52                   | 2.97   | 40.2                                   |
| RhFe/SiO <sub>2</sub> | 7.60                          | 2.08      | 1.76                  | 3.84                   | 3.76   | 50.6                                   |
| RhCo/SiO <sub>2</sub> | 14.8                          | 7.46      | 0.31                  | 7.77                   | 7.03   | 52.7                                   |
| RhNi/SiO <sub>2</sub> | 14.0                          | 4.61      | 0.14                  | 4.75                   | 9.25   | 33.9                                   |
| RhCu/SiO <sub>2</sub> | 21.1                          | 5.63      | 0.67                  | 6.30                   | 14.8   | 29.7                                   |
| RhZn/SiO <sub>2</sub> | 1.15                          | 0.24      | 0.57                  | 0.81                   | 0.34   | 70.4                                   |

<sup>a</sup> Including *n*-propanol and minor amount of isopropanol.<sup>b</sup> Including propanal, *n*-propanol and isopropanol.

CO pulse titration was conducted on the AutoChem II 2920 chemisorption analyzer. 50 mg sample was used for each time and reduced at 450 °C in a 50 mL/min 10% H<sub>2</sub>/Ar gas flow for 30 min. After cooling to room temperature in He, pulse of 10% CO/He was repeated till saturated adsorption of CO. The CO uptake amounts of Rh/SiO<sub>2</sub>, RhCo/SiO<sub>2</sub> and RhNi/SiO<sub>2</sub> are listed in Table S4. The increased CO uptake over RhNi/SiO<sub>2</sub> compared with Rh/SiO<sub>2</sub> reflects more exposure of Rh atoms on particle surface with dilution by Ni, though these two catalysts have similar average particle sizes of 2.9 nm (Fig. 3), and surface Ni may also adsorb CO. The decreased CO uptake of RhCo/SiO<sub>2</sub> is attributed to largely weakened CO adsorption strength with Co alloying (Fig. 7), and Co hardly adsorbs CO at low pressures. This explanation is validated by conducting the CO pulse at 0 °C that results in an increased uptake. TOF in Fig. 6b was calculated according to CO uptake at room temperature of each catalyst.

**Table S4.** CO uptake of the catalysts in CO pulse titration.

| <b>Catalyst</b>                          | <b>CO uptake<br/>(<math>\mu\text{mol/g}</math>)</b> |
|------------------------------------------|-----------------------------------------------------|
| Rh/SiO <sub>2</sub> (room temperature)   | 28.2                                                |
| RhCo/SiO <sub>2</sub> (room temperature) | 15.4                                                |
| RhCo/SiO <sub>2</sub> (0 °C)             | 24.2                                                |
| RhNi/SiO <sub>2</sub> (room temperature) | 47.9                                                |
